# Supplementary material for: The potential of mecciRNA in hepatic stellate cell to regulate progression of nonalcoholic hepatitis
Source: J Transl Med. 2022 Sep 4;20:393. doi: 10.1186/s12967-022-03595-1 (PMC9441041; doi:10.1186/s12967-022-03595-1)
Supplement: Supplementary file 8 — Additional file 8: Supplementary Table. 5 The 273 Differentially Expressed Genes Between Cluster 1 and Cluster 2. [file 12967_2022_3595_MOESM8_ESM.xlsx]

## Sheet: Differentially expressed genes
Gene.symbol	Padj	logFC
CCDC28A	1	-2.68e-05
GPR146	1	-5.78e-05
SLC25A43	1	0.0003135
ZRANB2	1	3.91e-05
ATAD2B	0.999	-0.000319
CHML	0.999	0.0005735
CLTCL1	0.999	-0.0006656
DHX34	0.999	-0.0002936
FUCA2	0.999	-0.000697
HEXIM1	0.999	-0.0002501
LCN12	0.999	-0.0005525
LSM10	0.999	0.0003958
LYRM7	0.999	-0.0003069
NPSR1	0.999	0.0008791
PUS7	0.999	0.0001166
RABL2B	0.999	0.0001743
SEPW1	0.999	0.0002873
SNX5	0.999	0.0007275
ABCB8	0.998	-0.0008449
ABTB2	0.998	0.0004923
ADCY3	0.998	-0.0003883
ADRA2A	0.998	-0.0003572
ALB	0.998	-0.0002058
C15orf61	0.998	0.000603
C5orf66-AS2	0.998	0.0006678
CDK10	0.998	-0.0016366
GNG5	0.998	0.0003793
PLCB1	0.998	-0.0007789
POLR2J4	0.998	0.0007421
SCN9A	0.998	-0.0008308
TMEM63C	0.998	-0.0005071
ZNF626	0.998	0.0008084
ACOT4	0.997	-0.0004462
ASB3	0.997	0.0007883
CCDC92	0.997	0.0006448
CD58	0.997	-0.0011213
LINC00493	0.997	0.0002953
ORAI3	0.997	0.0006236
PPA1	0.997	0.0003722
PPP3CA	0.997	-0.0008764
REV1	0.997	0.0003168
SLC39A3	0.997	-0.0008038
TCEAL1	0.997	-0.0013473
UTP6	0.997	0.0005621
WSB1	0.997	0.0008165
BTBD2	0.996	-0.0005785
FAM171A1	0.996	-0.0011691
FKBP2	0.996	-0.0009039
GTF3C3	0.996	0.0009693
IGFBP5	0.996	-0.0012275
LRRC46	0.996	-0.0031548
MAPK14	0.996	0.0057207
R3HCC1	0.996	0.0005855
TNS1	0.996	0.0009651
ADAT1	0.995	0.0019364
C6orf62	0.995	0.0007052
CETP	0.995	-0.0019696
CHKB	0.995	0.0021709
DCAF11	0.995	0.0006648
DKK2	0.995	-0.0025562
KRT3	0.995	0.0007866
LOC102724002	0.995	-0.0017175
PGPEP1	0.995	0.0017956
PLEKHA4	0.995	0.0016976
UBB	0.995	0.000516
WDFY1	0.995	0.0005147
ZNF546	0.995	-0.0025014
ZNF773	0.995	0.0008098
CCDC84	0.994	-0.0026596
CCSAP	0.994	0.0019266
CLTA	0.994	-0.0010517
COX6A2	0.994	-0.0033675
EXOC7	0.994	0.0010346
RAI1	0.994	0.0009027
RTN4IP1	0.994	-0.0015136
THSD4	0.994	-0.003382
TMEM8A	0.994	0.0011804
TNIP3	0.994	0.001281
TTC9	0.994	-0.0043753
UNC13B	0.994	0.0021081
ZAP70	0.994	-0.0013444
ZNF417	0.994	-0.0020115
B4GALT6	0.993	0.0048096
EGFR	0.993	-0.0015684
GAB2	0.993	-0.0025727
L3MBTL2	0.993	0.0024136
MALT1	0.993	-0.0017448
MEIG1	0.993	0.0026188
OR4C12	0.993	-0.0036123
POLR3F	0.993	0.001474
RRP36	0.993	-0.0013325
SLC35A3	0.993	0.0009282
TP53BP2	0.993	0.0015606
ACAD8	0.992	-0.001279
ARL6IP4	0.992	0.0017726
CLUAP1	0.992	-0.0008377
DACH2	0.992	-0.0079913
DPP8	0.992	-0.0032473
HEBP2	0.992	0.0013684
NPRL3	0.992	0.001389
PSIP1	0.992	0.0011056
QPRT	0.992	0.0014861
RPL11	0.992	0.0010621
RPSAP9	0.992	0.0009228
SLIT1	0.992	0.0039858
SNORD34	0.992	-0.0030782
TAF1B	0.992	0.0022656
UGP2	0.992	0.0015395
WASH2P	0.992	-0.002064
ALDH1A2	0.991	0.0045358
ANP32E	0.991	0.0015592
BRIX1	0.991	0.0023411
C1R	0.991	-0.0024731
C3orf18	0.991	-0.0073799
C3orf20	0.991	-0.0031045
CSF2RB	0.991	0.0058849
GNGT2	0.991	-0.0025722
NAT10	0.991	-0.0028099
SMG6	0.991	-0.0032427
WIPF3	0.991	0.0047086
AASDH	0.99	-0.0017675
DIS3L2	0.99	0.0018321
EVA1B	0.99	-0.0053473
FZR1	0.99	-0.0069706
KCNJ4	0.99	0.0072221
LARGE1	0.99	-0.0014497
NNT	0.99	0.0018509
SAP130	0.99	0.0025362
SOCS7	0.99	-0.0074
TACSTD2	0.99	0.0057153
UBE2D2	0.99	-0.0027567
WIPF1	0.99	0.0037841
ZNF785	0.99	-0.0023145
ACTR3	0.989	-0.0012707
CCBE1	0.989	0.0017605
COL4A1	0.989	0.0028438
CTNND1	0.989	0.0036898
GPR107	0.989	0.0051767
GPR19	0.989	0.0022874
LMO7	0.989	-0.0031755
LRR1	0.989	0.0035953
METAP1	0.989	0.0017694
NEUROD1	0.989	0.0044386
NTNG2	0.989	0.0075092
PAK1IP1	0.989	-0.0037137
SAYSD1	0.989	-0.0030203
SIRT1	0.989	-0.0015794
SLC35E1	0.989	0.0018216
C16orf54	0.988	0.006255
CPXM1	0.988	0.0029179
CT47A7	0.988	0.0078827
EXOSC8	0.988	-0.0046795
IRAK3	0.988	-0.008271
NSA2	0.988	0.0018277
PHF20L1	0.988	-0.0039784
POLK	0.988	-0.0025971
POMT1	0.988	-0.004178
PTS	0.988	-0.0027476
SLC16A5	0.988	-0.0091759
SNORD36C	0.988	-0.0031353
AHI1	0.987	-0.0059516
BMPR2	0.987	-0.0016284
CAB39L	0.987	0.0047713
CTRC	0.987	-0.0093557
DNAJB6	0.987	-0.0030264
FAM129B	0.987	-0.0045248
PCNP	0.987	-0.0014923
PEX5L	0.987	0.0085952
SNORD114-11	0.987	0.008706
TYW1B	0.987	-0.0038648
EGFLAM	0.986	-0.0041144
GDPD2	0.986	-0.0065172
MTAP	0.986	-0.0033317
NOTCH2NL	0.986	-0.006113
PPP2R3A	0.986	-0.0022594
ZNF22	0.986	-0.001909
C10orf76	0.985	-0.0035455
COQ2	0.985	-0.0045745
FKBP4	0.985	0.0024544
GLIS3	0.985	0.0064915
LEPROT	0.985	0.0018159
NONO	0.985	-0.0017378
OACYLP	0.985	0.0066686
PDCD4	0.985	-0.0024553
PSMA5	0.985	0.0017298
SETD3	0.985	-0.0014952
TBXA2R	0.985	-0.0094102
TRPT1	0.985	-0.0025826
WTAP	0.985	0.0113414
ZNF280D	0.985	-0.0072311
ICOSLG	0.984	0.0067916
KBTBD4	0.984	0.0068262
NIPAL1	0.984	0.0024161
PAPSS2	0.984	0.0026056
RCBTB1	0.984	0.0070485
SFXN4	0.984	-0.0021384
SPCS2	0.984	-0.0021962
UBQLN1	0.984	-0.0040456
ATF7IP2	0.983	0.0047561
BSN	0.983	-0.0100648
FUT6	0.983	-0.0065276
GRPEL1	0.983	0.0035196
KIF2C	0.983	-0.0204633
RPS29	0.983	0.0033099
TBC1D3B	0.983	-0.0087184
UQCRQ	0.983	-0.0022978
DMTN	0.982	0.005022
EXOSC10	0.982	0.0019862
GTF2H1	0.982	-0.0033685
IQSEC1	0.982	-0.0038162
LPIN2	0.982	-0.0034137
LRRC59	0.982	-0.0045388
PTP4A1	0.982	0.0036167
SMCHD1	0.982	0.0165381
ZNF626	0.982	0.0033878
ATP5L	0.981	0.0035789
EFCAB6-AS1	0.981	-0.0039587
FUCA1	0.981	-0.0026607
GNPTAB	0.981	0.0092044
HYAL1	0.981	-0.0028571
LURAP1	0.981	0.0132914
NAPA	0.981	-0.0038425
RNF14	0.981	-0.0035372
SPATA31C1	0.981	0.0051945
SSFA2	0.981	0.0049271
TMOD3	0.981	-0.01105
AFTPH	0.98	-0.0025515
ARSD	0.98	0.0111897
BMF	0.98	0.0128547
CEP85L	0.98	-0.0142453
COX14	0.98	0.0029945
GLTSCR2	0.98	0.0029901
KPNB1	0.98	0.0024963
MAGED2	0.98	-0.0065016
PARVA	0.98	0.0094863
UBA5	0.98	-0.0047875
AIG1	0.979	-0.0025896
AMBP	0.979	0.0027557
CRLF2	0.979	0.0094957
CSTF3	0.979	0.0073656
DNM1L	0.979	-0.0209318
FBXO6	0.979	-0.0050018
GBA2	0.979	-0.0075605
GCH1	0.979	0.004527
HIST1H2BC	0.979	-0.0089873
LEMD3	0.979	-0.0032876
MAGEH1	0.979	0.0056061
MPLKIP	0.979	-0.0045576
RND2	0.979	-0.0052353
AKAP13	0.978	0.0040495
CD247	0.978	0.0134301
CDY1B	0.978	0.0312687
DNAJC10	0.978	-0.0044697
EPCAM	0.978	0.012584
GRTP1	0.978	-0.0043076
SETD6	0.978	-0.0047916
SOD1	0.978	0.0027682
ZNF24	0.978	0.0081737
C9	0.977	0.0050411
PAXIP1	0.977	0.0056649
PDDC1	0.977	0.0079136
PSAP	0.977	0.0033076
RPRD1B	0.977	-0.0088318
RPS27L	0.977	-0.0047378
S100A9	0.977	-0.0121817
SLC25A46	0.977	-0.0035716
TIGD7	0.977	-0.0078738
ABCC6	0.976	0.007791
CECR5-AS1	0.976	0.011277
CPM	0.976	-0.0074224
DNAJC25-GNG10	0.976	-0.0061786
FAU	0.976	0.003191
ITGB3BP	0.976	0.0137606
LINC00563	0.976	0.0141331
RELB	0.976	0.0087299
SLCO4A1	0.976	-0.0085829
SRD5A3	0.976	-0.0084009
STRADA	0.976	-0.0033718
TMEM216	0.976	0.0095238
TRAPPC8	0.976	0.0027929
TTC1	0.976	0.0089781
ZNF330	0.976	-0.0027013
ZNF737	0.976	-0.0135566
BANF1	0.975	-0.0037932
MDM4	0.975	-0.0062724
PGK1	0.975	0.0038864
SAP30BP	0.975	0.0115766
SCHIP1	0.975	0.0103399
SULT1A3	0.975	-0.0127439
TOPORS	0.975	0.0073689
TXNDC17	0.975	-0.0031281
ZCCHC10	0.975	-0.0039254
ACSM2B	0.974	0.0037036
DOCK7	0.974	-0.0060536
EPN2	0.974	-0.0045279
GNL3	0.974	0.0089596
GOSR2	0.974	0.0072774
GSAP	0.974	0.0081587
HEATR3	0.974	0.0039532
HES6	0.974	0.0121454
HNRNPUL1	0.974	0.0063695
IQCB1	0.974	-0.0076326
RBM5	0.974	-0.0042532
SERTAD3	0.974	-0.0113386
SETDB1	0.974	-0.0076524
SLC35G6	0.974	-0.007182
VPS41	0.974	0.0038123
ACAT2	0.973	0.0137629
BCL2L15	0.973	-0.0239476
BOLA2	0.973	0.0044869
C1orf198	0.973	-0.0072324
C5orf22	0.973	-0.0158029
DCTN6	0.973	-0.0048986
ITCH	0.973	0.0036111
POU3F1	0.973	0.0211759
PRKCB	0.973	0.0284978
PSMC6	0.973	-0.004494
RER1	0.973	0.0064939
ALG2	0.972	0.0069804
AP1AR	0.972	-0.0104022
AP5S1	0.972	-0.0082244
ATP11A	0.972	-0.0081537
CAMSAP1	0.972	0.009855
DBI	0.972	0.0046741
GMPS	0.972	-0.0096899
LIMK2	0.972	0.0178555
NDST2	0.972	0.0048383
PFN2	0.972	-0.0162272
PMCHL1	0.972	0.012631
TMEM115	0.972	0.004825
ANG	0.971	0.0077985
ARL6	0.971	0.0286202
ATP6V1H	0.971	0.0070024
BAG2	0.971	0.0111814
GTPBP8	0.971	0.0171169
HADH	0.971	0.0031939
HDDC3	0.971	-0.0046163
PDE8A	0.971	0.0066552
RTN4	0.971	0.0034445
TAPT1-AS1	0.971	0.0132151
UBE2Z	0.971	0.0072278
ZNF768	0.971	0.0187078
ATP2A1	0.97	0.0174344
C8orf33	0.97	0.0041912
DDX28	0.97	-0.0064947
GLRX3	0.97	-0.0083886
LELP1	0.97	0.0140055
NUDT15	0.97	-0.0054331
OR4M1	0.97	0.0287812
PAFAH2	0.97	-0.0073571
PHIP	0.97	-0.0042936
PPP6R3	0.97	0.0066925
RECK	0.97	-0.00499
SLC7A5P2	0.97	0.0035515
SNORD11	0.97	-0.0114136
SPECC1	0.97	-0.012881
AMZ2	0.969	0.004913
CHRNA2	0.969	0.0112428
CMBL	0.969	0.0056367
COQ3	0.969	0.0080776
CR2	0.969	-0.037394
DHX36	0.969	0.0068405
DYRK1B	0.969	0.013833
EXO5	0.969	0.0049602
MADD	0.969	-0.0066124
NCKAP5	0.969	-0.0063054
NCOA5	0.969	-0.0187456
RPA1	0.969	0.0099303
SMARCAD1	0.969	0.0065267
STK19	0.969	0.0071256
TRIM33	0.969	0.0037338
ANAPC15	0.968	0.0118027
APC2	0.968	0.0071606
FPR1	0.968	0.032401
IL10RB	0.968	-0.0120079
NPHP3	0.968	0.0067293
POP7	0.968	-0.0098576
QPCT	0.968	-0.0128149
SMARCC2	0.968	-0.0039251
TEPP	0.968	0.0130085
TIGD6	0.968	0.0149782
ZNF124	0.968	0.0123031
ACTR3B	0.967	0.0093861
ATXN7L3B	0.967	-0.0054077
BEX1	0.967	-0.0083976
CLEC4G	0.967	0.0100109
DGUOK	0.967	0.0047145
FUT8-AS1	0.967	-0.0070472
ITGBL1	0.967	0.0638441
PNP	0.967	-0.0108901
RRBP1	0.967	-0.0078734
SEPHS1	0.967	0.0086944
TCF25	0.967	-0.0043185
ZXDC	0.967	-0.0170639
DAPK2	0.966	-0.0209718
GOLGA6B	0.966	0.0211007
HLA-E	0.966	-0.0099809
ITGA5	0.966	-0.0080052
MRPL18	0.966	-0.0046234
MYO7A	0.966	-0.0093453
PLEKHJ1	0.966	0.0261258
RPL5	0.966	0.0038745
SNX3	0.966	-0.0043992
TGFB3	0.966	0.0103228
BMI1	0.965	-0.0040407
CFHR3	0.965	-0.0268437
CHMP4B	0.965	0.0089948
DOCK8	0.965	-0.0100336
FGA	0.965	0.0046138
GRN	0.965	0.0066716
GTF2H3	0.965	-0.0062476
LEAP2	0.965	0.0101078
LLGL2	0.965	0.0249074
MLST8	0.965	0.0062709
MRPL32	0.965	-0.0045646
PDZD8	0.965	-0.0073079
PPP2R1B	0.965	0.0073199
PRMT1	0.965	0.0134517
SERINC1	0.965	0.004283
TBRG4	0.965	-0.0066057
UBE2D4	0.965	-0.004664
AQP3	0.964	-0.0271039
CEP41	0.964	-0.0142321
CPSF3L	0.964	0.0150821
DDX5	0.964	0.0073077
DNAJB5	0.964	0.0165097
FAM207A	0.964	-0.0273196
FHL1	0.964	-0.0076429
GPC5	0.964	-0.0124206
HVCN1	0.964	-0.020011
MOB1A	0.964	-0.0237826
NELFB	0.964	0.0068764
RPS12	0.964	0.0056325
ANKHD1	0.963	-0.0055885
ARHGEF3	0.963	-0.009133
B4GALT2	0.963	-0.0119459
BTF3	0.963	0.0058802
COQ8A	0.963	-0.0060784
HEBP1	0.963	-0.0069185
HEXIM2	0.963	0.0177368
NDUFAF7	0.963	0.0064686
NOP10	0.963	-0.004779
OSCAR	0.963	-0.0288039
TAF1	0.963	-0.03702
VPS37A	0.963	-0.0054039
ZC2HC1A	0.963	0.0189056
JAZF1	0.962	0.0126394
LEP	0.962	-0.0065813
PTTG1	0.962	-0.0174746
PXMP4	0.962	-0.0076682
SH3BGRL2	0.962	-0.0063309
SNPH	0.962	-0.0192335
SNX2	0.962	0.0046961
STK26	0.962	0.0075423
TCTN3	0.962	0.019841
TWSG1	0.962	0.0070984
UQCR10	0.962	-0.0176442
USP1	0.962	-0.0067088
USP16	0.962	0.0064693
ZNF808	0.962	-0.0154032
ALDH3A2	0.961	-0.006662
CTNNB1	0.961	-0.0151497
DHX29	0.961	-0.0049319
GPD1L	0.961	-0.0080649
ITSN1	0.961	-0.0084952
JAG1	0.961	0.0133523
MPPED1	0.961	-0.0376734
PRRG2	0.961	-0.0147417
RAC3	0.961	0.0112674
SDAD1	0.961	0.004047
SET	0.961	-0.0055713
XRN2	0.961	-0.0068333
CALD1	0.96	-0.011157
CWF19L1	0.96	-0.0080091
EPHX2	0.96	0.0066916
FAM53B	0.96	-0.0118859
GPR182	0.96	-0.0149684
ITGAX	0.96	-0.0614783
NLGN4X	0.96	0.0079471
RPS3A	0.96	0.0041802
SIGLEC6	0.96	-0.0068783
SLC29A4	0.96	0.0355335
TM7SF2	0.96	0.0146678
TMA16	0.96	0.0112283
TXNDC9	0.96	-0.0119131
ALDOA	0.959	-0.0118387
ARHGEF26	0.959	-0.0122449
DAZAP2	0.959	-0.0043661
DLX2	0.959	0.025722
EPB41L5	0.959	0.0078445
FAM161A	0.959	0.0241441
IFNAR2	0.959	0.0166772
KCNK4	0.959	-0.0116351
P2RY11	0.959	0.0114924
PILRA	0.959	0.0086121
PQBP1	0.959	0.0087329
SIL1	0.959	-0.0108542
SLC39A8	0.959	0.0098942
SNORA59B	0.959	-0.0200358
SUCNR1	0.959	-0.019235
TIMM10B	0.959	-0.0126164
TSPO	0.959	0.0116298
ATF4	0.958	0.0204897
C6orf1	0.958	-0.0284955
COPS7A	0.958	-0.0045843
HNRNPCL3	0.958	0.0044981
NAPG	0.958	0.0261842
PDLIM5	0.958	-0.0132874
PHKB	0.958	-0.0073847
TSPAN5	0.958	-0.0232893
ZNF860	0.958	-0.0074193
ARAP3	0.957	-0.0093427
HAAO	0.957	0.0078216
HM13	0.957	-0.0070599
LIN7C	0.957	0.0091346
METTL7A	0.957	-0.0046253
NDUFS2	0.957	-0.0058017
OSTC	0.957	-0.0063232
PRKCH	0.957	0.0160948
ANKRD12	0.956	0.0065387
ANKS6	0.956	-0.0226098
ARID1A	0.956	-0.0066905
ARPIN	0.956	-0.0203509
FSCB	0.956	-0.0173696
HERC5	0.956	-0.0128004
LYZL6	0.956	-0.0216756
MAP7	0.956	0.007464
NAA20	0.956	0.0042442
NR1D2	0.956	-0.0144693
PIAS2	0.956	0.0235885
PLA2G2D	0.956	0.007573
PTRF	0.956	0.0100519
SLBP	0.956	-0.0187338
SOX6	0.956	0.0232402
TNFSF13B	0.956	-0.0184477
TSC22D2	0.956	0.0129193
WDR91	0.956	-0.0188302
ZNF407	0.956	0.0240459
AMOTL1	0.955	0.0250296
APOL1	0.955	0.0440438
MEX3C	0.955	-0.0094591
NUDT16L1	0.955	0.0131991
PGM5-AS1	0.955	0.0082207
PORCN	0.955	-0.0622715
PSAT1	0.955	-0.009854
PTK2B	0.955	-0.0144951
RAX2	0.955	0.006493
RHOQ	0.955	0.0112111
RNVU1-7	0.955	-0.0345383
RSL1D1	0.955	-0.0083144
ZNF326	0.955	-0.0200426
ZNF786	0.955	-0.0059173
CLK2P1	0.954	-0.0095052
CRKL	0.954	0.0071127
FEZ2	0.954	0.0110659
HTRA2	0.954	-0.0119268
IWS1	0.954	-0.0138599
LCK	0.954	-0.0221913
NPB	0.954	0.0197592
PPFIA1	0.954	-0.0206185
SLC41A2	0.954	-0.0128324
YEATS2	0.954	-0.0170735
CHRNE	0.953	-0.009298
CISD2	0.953	0.0077047
DNAJC25-GNG10	0.953	-0.0287294
F8A1	0.953	0.0118924
FANCL	0.953	-0.0107271
GALNT1	0.953	-0.006225
HIST3H3	0.953	-0.0175794
LOC153577	0.953	-0.0208375
LONRF1	0.953	-0.0175181
RECQL	0.953	-0.0080053
RHEB	0.953	0.0075271
SNORD9	0.953	-0.0369271
ADGRL1	0.952	-0.0201939
APH1A	0.952	0.0071416
ARHGEF35	0.952	-0.0107932
C21orf58	0.952	-0.0075743
DPH5	0.952	-0.0067912
EEF1D	0.952	0.0065592
EPB41L2	0.952	-0.0153015
FBXL3	0.952	-0.010166
FTL	0.952	-0.005529
IPO4	0.952	-0.0271449
LINC01479	0.952	0.0245415
LOC100996671	0.952	-0.022999
NTMT1	0.952	0.0141953
PLGLB1	0.952	0.0098096
TRMT10A	0.952	0.0317836
TTC13	0.952	-0.0116874
WDR7	0.952	-0.0165609
BEST3	0.951	0.0348692
DHX15	0.951	-0.0054536
FN1	0.951	0.0118704
GAL3ST3	0.951	0.0233555
IRF6	0.951	0.0218036
MBTD1	0.951	0.0094461
NUDT6	0.951	-0.0117314
PAF1	0.951	-0.0093454
RSU1	0.951	-0.0061364
SLAMF6	0.951	-0.008229
ZNF225	0.951	0.0222842
AADACP1	0.95	-0.0164667
ADPGK	0.95	0.0132436
BTBD6	0.95	-0.0097314
CDK5RAP2	0.95	-0.0235099
CETN3	0.95	-0.0111416
CYP2E1	0.95	0.0050104
FAM206A	0.95	-0.0158692
KCNQ4	0.95	0.0429454
LINC00152	0.95	0.0391158
LYPD1	0.95	0.0306461
PFKFB3	0.95	0.025533
PPP1CB	0.95	0.0105796
PTPN12	0.95	-0.0100141
RTF1	0.95	0.0106949
SCN3B	0.95	0.0244002
SF3A2	0.95	-0.0079543
TMCC1	0.95	-0.0212495
TMEM185A	0.95	0.0174469
UBE2A	0.95	0.0134632
ACOT8	0.949	-0.0123371
DOPEY2	0.949	-0.0082674
FOLH1	0.949	-0.0141463
GUCY1A3	0.949	0.0299534
INMT	0.949	0.0097482
LGMN	0.949	-0.0127224
MSL3	0.949	0.0168902
PRDX5	0.949	0.0091073
SELK	0.949	0.0136203
SRPRA	0.949	0.0081936
TARS2	0.949	-0.0099393
ALDOB	0.948	-0.0090953
AMY2A	0.948	-0.0116256
APLP2	0.948	-0.0079331
C9orf85	0.948	-0.00845
EXT1	0.948	-0.013149
KANK3	0.948	-0.0152132
METTL21B	0.948	-0.0098036
NPL	0.948	-0.0111056
PMS2	0.948	0.0130803
PRKCB	0.948	0.0403945
SPATS2L	0.948	0.0081391
STARD3NL	0.948	-0.0208921
VEGFA	0.948	0.0074207
ZNF358	0.948	0.0059831
ACSM2B	0.947	-0.0076737
ALB	0.947	0.0053064
ANKRD36B	0.947	-0.0196367
CBX7	0.947	0.0118995
COPS7B	0.947	-0.0090401
DNAJC30	0.947	-0.0340685
DNMT3B	0.947	-0.0172397
ECHDC3	0.947	0.0122948
FRMD4B	0.947	-0.0415891
GARS	0.947	0.0120687
MTMR3	0.947	-0.0400775
PQLC2	0.947	-0.0112286
SAAL1	0.947	-0.016908
SNAP29	0.947	-0.0198905
SUGT1	0.947	0.0102242
TMEM70	0.947	0.0138924
ZNF823	0.947	-0.0134922
BCAS4	0.946	0.0316224
HNRNPA2B1	0.946	0.0067925
ITIH5	0.946	0.0061259
KCNH8	0.946	-0.0168679
MAFG	0.946	0.0302669
MARK3	0.946	0.0160541
NME1-NME2	0.946	-0.0174871
PGM1	0.946	-0.0091595
PHIP	0.946	-0.0104532
PKLR	0.946	-0.0180457
RNA18S5	0.946	0.010577
ZFAND1	0.946	0.0094729
ZNF280C	0.946	-0.0242939
C1orf52	0.945	0.0093318
CNOT8	0.945	-0.0107846
IFFO2	0.945	0.0403735
LINC01567	0.945	-0.0123037
MSH6	0.945	0.0063856
NSA2	0.945	-0.0110538
OPRPN	0.945	-0.0344677
PBLD	0.945	-0.0127128
RPA1	0.945	0.0243479
RPL13AP5	0.945	-0.0108695
RPL37A	0.945	0.0135208
RPS11	0.945	0.008237
TSNAX	0.945	0.0252113
APIP	0.944	0.0340905
C8A	0.944	-0.0073649
GNL3	0.944	-0.0074625
HNF1B	0.944	0.0214901
HYI	0.944	0.0253186
LINC00161	0.944	0.0123189
MAGEF1	0.944	0.0217106
NQO1	0.944	-0.0217051
RFPL4A	0.944	0.0310759
RPS3A	0.944	0.0090289
SLC25A20	0.944	0.011564
ZC3H12C	0.944	0.0117334
ZDHHC9	0.944	0.008347
FAM170B	0.943	0.0183539
GRAMD1A	0.943	0.0168185
LGI3	0.943	-0.0319161
MYH14	0.943	0.0462352
RAB3IP	0.943	0.0122432
RBM10	0.943	-0.0187143
SLC37A3	0.943	-0.023166
SNURF	0.943	0.0346223
STPG1	0.943	-0.0244344
TBC1D20	0.943	-0.0170646
AOC1	0.942	0.0360007
CDC16	0.942	-0.0095503
FXR1	0.942	-0.0078597
HIGD2A	0.942	-0.0060539
OTUD5	0.942	-0.0266297
PVT1	0.942	0.0380357
SNORD84	0.942	-0.0461495
UBN1	0.942	-0.0091327
APITD1	0.941	-0.0176087
CBWD1	0.941	0.0201029
COX15	0.941	0.0117657
GPR180	0.941	-0.0430747
HYALP1	0.941	-0.0159661
NUP88	0.941	-0.011424
SNORA71A	0.941	0.0519463
ST3GAL1	0.941	0.017733
WARS	0.941	-0.0169367
WBP11P1	0.941	-0.0272658
BAG6	0.94	0.0093052
CCDC60	0.94	0.0432944
ELN	0.94	-0.0398141
FBXL3	0.94	-0.0174438
IQCC	0.94	0.0367046
MIS18A	0.94	-0.0268921
PLGLB2	0.94	0.0097631
PSG3	0.94	-0.0631354
RRP15	0.94	-0.0164087
SECISBP2	0.94	0.0116858
WHAMMP2	0.94	-0.0556028
ZFP3	0.94	0.0231606
ZNF263	0.94	-0.0154178
ASL	0.939	-0.0157752
BTBD3	0.939	-0.0118203
CXCL17	0.939	0.0242057
CYB5R4	0.939	0.0158471
FGL1	0.939	-0.0275478
PABPC1	0.939	-0.0093848
UTP20	0.939	-0.0300574
WTAP	0.939	-0.0109017
ABCB7	0.938	0.0118838
ALOX5	0.938	-0.032394
ATG101	0.938	-0.0213017
COG3	0.938	-0.0319116
KCNAB2	0.938	0.0336519
MRPS30	0.938	0.0086085
NANOGNB	0.938	-0.0376912
PRKRA	0.938	-0.0097674
SLC6A11	0.938	-0.0549083
STK40	0.938	-0.0118634
ABHD15	0.937	0.0110882
FAM86B3P	0.937	-0.0701415
FLYWCH1	0.937	-0.0197932
ZC3H11A	0.937	-0.032231
ZC3H3	0.937	-0.0197615
ADSS	0.936	-0.0095647
CERS2	0.936	-0.0086794
ESD	0.936	-0.0191488
MTPN	0.936	-0.015929
OPA3	0.936	0.0104736
SEC14L1P1	0.936	0.0230009
SPDYE2	0.936	0.0323374
BBS2	0.935	0.0139927
CCT6P1	0.935	-0.0095365
CLCA4	0.935	-0.0298033
HIST1H1C	0.935	0.0177238
NUDT4	0.935	-0.0238506
PPP1R18	0.935	-0.0169207
PXYLP1	0.935	0.0190281
RNU1-1	0.935	0.0321518
VCX2	0.935	0.0539178
AKIP1	0.934	0.0135857
ALDH8A1	0.934	-0.0127279
CBX3	0.934	-0.0103226
F2RL2	0.934	0.0314357
FAM134B	0.934	-0.0426083
G3BP2	0.934	-0.0092777
GPRASP1	0.934	0.029077
MRPL13	0.934	-0.0093651
NOL11	0.934	0.0087737
RNPC3	0.934	0.0180495
S100A6	0.934	0.0139369
SHROOM1	0.934	-0.0686973
SPP2	0.934	0.0110472
TMEM19	0.934	0.055385
VSNL1	0.934	0.0184159
ACSM5	0.933	0.020082
ADAMTS4	0.933	-0.0314423
CCNG1	0.933	-0.0127723
CDPF1	0.933	0.0237483
DROSHA	0.933	0.0150135
FARS2	0.933	-0.0168446
FBXW7	0.933	-0.0281088
GTPBP10	0.933	0.013095
LIPE-AS1	0.933	0.0400741
LRRC72	0.933	-0.0213221
MAP3K12	0.933	-0.0324199
MED14	0.933	-0.0099697
MMAB	0.933	0.0118516
MRPL37	0.933	-0.0080911
PAK5	0.933	0.0680291
PRSS36	0.933	-0.0219676
RNF128	0.933	-0.0073051
SNX1	0.933	-0.0237142
ARHGAP17	0.932	-0.0290231
CCDC14	0.932	-0.011997
DMTF1	0.932	0.0102336
GAK	0.932	0.0153978
INTS1	0.932	0.0105038
JCHAIN	0.932	-0.0339008
MARCKS	0.932	0.010646
MRPL10	0.932	-0.0133235
MS4A6A	0.932	-0.0170292
NEFL	0.932	-0.0328266
PABPC4	0.932	-0.0124216
RPS6KC1	0.932	-0.0224492
SMARCA1	0.932	-0.0097521
SPDYE8P	0.932	-0.0530737
SRRM1	0.932	-0.0072989
UTS2R	0.932	0.0302346
VPS13B	0.932	-0.0683604
ZNF282	0.932	0.0253263
ACAT1	0.931	0.0086763
ATMIN	0.931	0.0289613
CLDN10	0.931	0.0346204
CTNNAL1	0.931	-0.0194346
HORMAD1	0.931	0.0834534
ITGA4	0.931	-0.0345282
MICU3	0.931	-0.0104369
PAXBP1	0.931	0.013752
RFXANK	0.931	0.050395
RPN1	0.931	-0.009952
SMIM13	0.931	0.0298472
ACAA2	0.93	-0.0125079
AKR1C2	0.93	0.0297827
ATP5S	0.93	-0.0195967
CT47A1	0.93	-0.0786045
DUT	0.93	0.0089787
EFR3A	0.93	0.0102823
FOXO4	0.93	0.0106656
IGF2	0.93	0.0300273
MRPL45	0.93	0.0227434
NKTR	0.93	0.0107413
PMS2CL	0.93	0.043869
ATRIP	0.929	0.0507112
CCDC77	0.929	0.0260763
FAM200B	0.929	-0.0200551
FMO3	0.929	-0.007935
GCAT	0.929	0.0127079
LACTB	0.929	-0.0116895
RPSA	0.929	0.0107336
TDP2	0.929	0.0115472
COX18	0.928	-0.045604
FCGR2B	0.928	-0.0188202
GTPBP4	0.928	0.0131866
LAMC1	0.928	0.0097511
SCMH1	0.928	-0.126135
SYBU	0.928	-0.0226303
TJP1	0.928	-0.0150566
TPM3	0.928	-0.0215991
ZFC3H1	0.928	-0.022793
ZNF493	0.928	0.0457491
ACTR2	0.927	0.0107166
CAV2	0.927	-0.0132275
HK3	0.927	-0.0312886
IGFBP3	0.927	0.0123045
LILRA6	0.927	0.0341712
MVD	0.927	-0.0508897
PCDHGA1	0.927	-0.0759366
RGS21	0.927	0.0367265
SERGEF	0.927	0.0175121
SNORD52	0.927	0.06601
TATDN3	0.927	0.0116259
ANAPC1	0.926	0.021639
BMP2	0.926	0.0324087
DCLK3	0.926	-0.0392236
GPR88	0.926	-0.0988218
HDAC2	0.926	-0.0095278
INTU	0.926	0.0249896
KIAA1217	0.926	-0.0275103
LCOR	0.926	0.0168294
PAXBP1	0.926	0.0246197
PDSS2	0.926	0.0110117
POC1A	0.926	-0.029031
POLR1B	0.926	-0.0145055
PYROXD1	0.926	0.0566944
TBC1D4	0.926	0.0254047
UBR3	0.926	-0.0153468
ZNF223	0.926	-0.0121603
ELP6	0.925	0.0160997
GFOD2	0.925	-0.0157414
GOLT1A	0.925	0.0135071
KBTBD3	0.925	-0.0283349
LINC00261	0.925	-0.0162686
NUDCD2	0.925	0.0125651
PLAC8	0.925	-0.0208942
TAX1BP1	0.925	-0.0100743
WDR5	0.925	-0.0533357
ZIC4	0.925	-0.0255241
ZNF747	0.925	-0.067376
BCL2L14	0.924	0.0659938
CAPN12	0.924	-0.0316301
CKAP5	0.924	-0.0180805
GPR108	0.924	0.0160002
GTDC1	0.924	-0.0627853
H3F3A	0.924	-0.0086337
KLF9	0.924	-0.0147603
LPGAT1	0.924	-0.063613
MCAT	0.924	-0.0290012
ANKRD49	0.923	-0.0221495
C17orf102	0.923	-0.0218825
CDC20B	0.923	-0.0857043
HNRNPAB	0.923	-0.0356173
PPP2R3C	0.923	-0.0110321
VWA8	0.923	0.0210241
C18orf32	0.922	0.0106638
EMC6	0.922	0.0395836
FAF2	0.922	0.0096897
FAXDC2	0.922	0.0157629
GATAD1	0.922	0.0273101
GNPNAT1	0.922	-0.0136716
ICAM3	0.922	0.0174721
IRS2	0.922	-0.0298545
ISOC1	0.922	-0.0104772
P2RX7	0.922	-0.0361361
PDK3	0.922	-0.0133918
RAB17	0.922	-0.0107763
RAB27B	0.922	-0.0340766
SLC9A7	0.922	-0.0156008
ZNF433	0.922	-0.0482492
BCAS2	0.921	-0.010167
CCDC122	0.921	0.0490146
DDX5	0.921	-0.0307974
DVL3	0.921	0.038867
IGFBP7	0.921	-0.0129029
IKBKAP	0.921	-0.032644
NAV2	0.921	0.0286752
RENBP	0.921	0.0296334
TOP2B	0.921	-0.0123671
ZBTB45	0.921	0.0211236
ZMIZ1	0.921	0.009847
ACPT	0.92	-0.0221274
AQP11	0.92	0.0173694
CAPRIN1	0.92	-0.020787
CCDC88C	0.92	-0.0361256
CD3E	0.92	-0.0450581
CD84	0.92	0.0318535
FCN1	0.92	-0.0343036
GALC	0.92	-0.0186594
MANEA	0.92	-0.0119888
NEDD9	0.92	-0.0385186
SRSF9	0.92	0.0085344
TIMM22	0.92	0.0157875
ZNF514	0.92	0.020272
BAG5	0.919	-0.0404081
CEP85	0.919	0.0352202
CLINT1	0.919	0.0094637
GIN1	0.919	-0.0250481
GSK3B	0.919	0.0180075
KDM1B	0.919	-0.0429903
LTB4R	0.919	-0.034424
POLR2J4	0.919	-0.0131872
SNORD3D	0.919	-0.0250259
TCEA1	0.919	-0.0129242
TSEN2	0.919	0.0160325
WASH7P	0.919	-0.0676715
CBWD6	0.918	-0.0277926
DUS3L	0.918	0.0216905
EMP3	0.918	0.0149339
OTUD7A	0.918	-0.0586379
PI4KAP2	0.918	0.0413313
PLA2G15	0.918	-0.0222827
PRKCI	0.918	-0.0195366
RPL3	0.918	0.012554
TRNT1	0.918	0.021339
TSEN15	0.918	0.0200491
ZNF771	0.918	-0.0167601
BOLA3	0.917	0.0124605
DOK4	0.917	-0.0428387
IGFBP1	0.917	0.0622498
MSX2P1	0.917	-0.0266886
PDCD7	0.917	-0.0103838
PROSC	0.917	-0.0105011
SVIL	0.917	-0.0109004
UMOD	0.917	-0.0290155
ZNF165	0.917	0.0168232
ALKBH3	0.916	-0.0334289
ANAPC16	0.916	-0.0142942
BOLL	0.916	-0.0523923
CCNY	0.916	-0.0153526
CHCHD7	0.916	-0.082396
CLCN1	0.916	-0.0256827
COG4	0.916	0.0269031
CYP2C8	0.916	-0.0116167
FILIP1	0.916	0.0427093
IMMT	0.916	-0.0111732
PPP1CC	0.916	-0.0093578
TEF	0.916	0.0323381
TMEM209	0.916	0.0148953
TSPAN12	0.916	-0.0231069
ZNF148	0.916	-0.0210285
CCDC167	0.915	0.0270789
COPS8	0.915	0.0160785
FAM168A	0.915	0.0090351
LOC729970	0.915	0.0464887
MRPS34	0.915	0.0218143
NXT1	0.915	0.0170549
PDCD6IP	0.915	0.0139128
SYS1	0.915	-0.0321234
ZNF83	0.915	0.0436387
ABL1	0.914	0.0151653
ANKRD27	0.914	0.0297266
CDH18	0.914	0.0684143
COPB2	0.914	0.012125
FGGY	0.914	0.0190828
FXYD7	0.914	-0.0557293
GNPTAB	0.914	-0.0283936
ITM2C	0.914	0.0212872
LLPH	0.914	-0.0137935
MED15	0.914	0.0405271
NIPAL2	0.914	0.0679078
PHLDB1	0.914	-0.0209923
PPP2CA	0.914	0.0106989
UNG	0.914	-0.0456271
ACTRT2	0.913	-0.043252
BCOR	0.913	0.0310002
CNOT2	0.913	0.0210383
DEPDC5	0.913	-0.0202591
EEF1A1	0.913	-0.0088765
FRK	0.913	-0.0281253
GFRA1	0.913	0.0427978
NDUFV1	0.913	0.0131114
SLC25A20	0.913	-0.0285318
SOX3	0.913	0.0280211
TIMM23	0.913	0.0380633
VCPIP1	0.913	0.01606
EMCN	0.912	0.0823686
FABP5	0.912	-0.0717554
FKBP3	0.912	0.0116206
KCNK6	0.912	-0.05252
KIFAP3	0.912	-0.0140515
KRTAP13-4	0.912	0.0486576
LIX1L	0.912	0.0893208
MIR1226	0.912	0.0518852
OR5K4	0.912	-0.0304854
SETD2	0.912	0.010085
SOX6	0.912	0.0444021
ANKS6	0.911	-0.0430691
ATP6V1D	0.911	0.0186491
DNAJC27	0.911	-0.0286502
ELMOD2	0.911	0.0536417
KLHL12	0.911	0.037398
NPR3	0.911	0.0649044
PHF21A	0.911	-0.0174194
RAD21	0.911	-0.0120166
ADI1	0.91	0.0097463
C8orf58	0.91	0.0752776
CSNK2A2	0.91	0.0169723
FAM177A1	0.91	0.0114777
GOLGA6B	0.91	-0.073317
KCNK7	0.91	-0.100336
MAPK3	0.91	0.0212219
PPP2R5C	0.91	0.0121301
PRKAR1A	0.91	0.011226
PRMT8	0.91	-0.0310059
SI	0.91	0.0513301
ARL16	0.909	-0.0163087
ATPAF1	0.909	0.0177446
DEFB106B	0.909	0.0455153
EEF1B2	0.909	0.0281786
FARP2	0.909	-0.0467747
HEG1	0.909	-0.0336738
HIST1H4E	0.909	-0.0254231
HMMR	0.909	-0.0945226
IL10	0.909	0.0111205
KCNK1	0.909	-0.0406049
MAN2A2	0.909	0.0310288
MRPS6	0.909	-0.0149214
NUBPL	0.909	0.0144421
RDH16	0.909	0.0144805
SMIM14	0.909	0.0155575
TCEA1	0.909	0.051286
TMEM183A	0.909	0.0090886
ARRB1	0.908	-0.025486
BMP8B	0.908	-0.0146065
CAP2	0.908	-0.0196977
G6PD	0.908	0.0277685
GDF15	0.908	0.0726721
LAPTM4B	0.908	-0.0522577
NEK2	0.908	-0.0462268
PPP1R13L	0.908	0.0447486
RAB20	0.908	-0.0280573
RPL11	0.908	-0.0114189
SLC7A9	0.908	-0.012605
TBC1D9B	0.908	-0.039066
CWC15	0.907	-0.0122861
EIF3B	0.907	-0.0567696
MTHFD1	0.907	-0.0136609
PPP1CA	0.907	0.0206381
ZW10	0.907	-0.0293963
CDC42EP1	0.906	-0.0611
COQ9	0.906	0.0177363
HIST1H2BD	0.906	-0.0386532
LINC01278	0.906	0.0210419
MGAT4A	0.906	-0.0337615
MRPL24	0.906	0.014375
MTMR10	0.906	-0.0121323
TCAIM	0.906	0.0268892
USP34	0.906	-0.0349584
ALDH8A1	0.905	0.0146931
CSNK1D	0.905	-0.0196933
IMPDH1	0.905	0.047188
PPP2R5A	0.905	0.024877
RAPGEF6	0.905	-0.029295
RBM22	0.905	0.011922
RPTN	0.905	0.112958
SBF1P1	0.905	-0.071394
CCIN	0.904	0.067576
KIAA1551	0.904	0.0213425
LINC00294	0.904	0.0292003
NAE1	0.904	0.0129067
RPL29P2	0.904	-0.026177
RPL34	0.904	0.039231
SIGIRR	0.904	0.0268568
SLC9A9	0.904	0.059265
SPRYD4	0.904	0.0133222
ACSL5	0.903	-0.0251381
CD53	0.903	-0.0507806
GTF2H5	0.903	-0.0130357
MGC57346	0.903	-0.0379124
OR2A9P	0.903	-0.0599548
PHOX2B	0.903	-0.0617451
SNX14	0.903	0.015057
TMEM260	0.903	-0.0592167
ADGRG5	0.902	0.0426389
ADORA1	0.902	0.0606036
ECT2L	0.902	-0.0693055
GNL3	0.902	-0.059427
GPN3	0.902	-0.0167956
HINT3	0.902	-0.0213859
PUM3	0.902	-0.0290788
RABGAP1L	0.902	0.0229322
RNF170	0.902	-0.0150387
SCP2	0.902	-0.0255064
SUMO4	0.902	-0.0197405
TM4SF20	0.902	-0.0780357
TRAT1	0.902	-0.049241
CHMP2B	0.901	0.017552
CKS1B	0.901	0.0298485
DHX40	0.901	0.0206791
GOLGB1	0.901	-0.0188343
NME2	0.901	0.012701
PPFIBP2	0.901	0.0147859
RHBDF2	0.901	-0.0382151
RNASE4	0.901	0.0153389
TRIM28	0.901	-0.0234273
UBE2V1	0.901	0.0222549
VRK3	0.901	0.0373756
XKR8	0.901	0.0295364
2022-03-02	0.9	-0.0148746
ACOX3	0.9	-0.031038
ACTL6A	0.9	-0.0155541
BAIAP2	0.9	-0.0757815
C11orf95	0.9	-0.0160447
DHX16	0.9	0.0199685
ELMO1	0.9	-0.0784047
FAM213A	0.9	0.0227679
GTF3C5	0.9	-0.0366025
IFT88	0.9	0.0168026
PLSCR3	0.9	-0.0169965
SECISBP2L	0.9	0.0123313
SERPINA7	0.9	-0.0170241
SLCO2B1	0.9	-0.0189402
ST6GAL1	0.9	0.0216854
TSPOAP1	0.9	0.0470099
ADGRV1	0.899	0.0200929
B4GALT5	0.899	0.0157047
BAIAP2L2	0.899	0.065019
CAMSAP2	0.899	0.0179997
CLEC4GP1	0.899	0.0754039
NBPF11	0.899	0.0367055
PRRT2	0.899	0.058196
SNORA31	0.899	-0.0435471
STK25	0.899	-0.0202632
ZC2HC1C	0.899	-0.0544169
CAMK1D	0.898	0.038377
ERLEC1	0.898	-0.0184034
EVI2A	0.898	-0.0565865
FBXO17	0.898	0.0351372
GABPB2	0.898	0.0156556
LBH	0.898	-0.0293051
NHP2	0.898	-0.0151021
RPL29	0.898	-0.0361934
SLC44A2	0.898	0.0210156
ST3GAL6	0.898	-0.0157795
VNN2	0.898	0.0420773
ZDHHC8P1	0.898	-0.0178416
ATF4	0.897	0.0169603
B4GAT1	0.897	0.0199468
DTD2	0.897	-0.0620817
GALNS	0.897	-0.0295761
GPR156	0.897	-0.0556194
GYG1	0.897	-0.024178
HCK	0.897	-0.0230649
METTL3	0.897	0.0359437
PLAA	0.897	0.0160811
PPARA	0.897	-0.0315501
PPCS	0.897	0.0166128
RASA4CP	0.897	0.0240756
ZBTB11	0.897	-0.0202288
ADD3	0.896	-0.0152007
CDC42BPA	0.896	0.155431
ERMP1	0.896	-0.026282
FAM49B	0.896	-0.0149161
KDM6A	0.896	-0.0385965
MXD1	0.896	0.0501599
RELN	0.896	-0.039032
STX4	0.896	-0.0250112
TP53BP2	0.896	0.0523195
USP17L6P	0.896	0.0691956
ALG12	0.895	-0.054321
MOB2	0.895	0.0219982
NDUFC1	0.895	-0.0151168
UCP3	0.895	-0.0897934
CTSH	0.894	-0.0504565
IPCEF1	0.894	0.0415453
CLDND1	0.893	-0.0151228
CPNE3	0.893	-0.0129455
F12	0.893	0.0208915
FAM207A	0.893	-0.0335798
GPATCH2	0.893	-0.049111
JPH4	0.893	0.0218229
LINC01554	0.893	0.0446298
PPP1R14A	0.893	-0.0207948
RPL23AP32	0.893	0.0502946
SIRT7	0.893	0.0706851
SNRNP48	0.893	0.0401745
ZNF704	0.893	-0.0279846
ANGPTL3	0.892	0.0183466
ARHGAP24	0.892	0.0447719
AZI2	0.892	0.018663
C2orf47	0.892	0.0123457
N4BP2L2	0.892	0.0283678
SAMD11	0.892	0.0524089
SH3BGRL	0.892	0.0268538
SH3KBP1	0.892	0.0284286
UPRT	0.892	-0.0630268
ABHD2	0.891	-0.0289477
AKIRIN1	0.891	-0.0409645
CYP26A1	0.891	-0.0929663
EAF1	0.891	-0.0139721
FAM65A	0.891	-0.0195439
LRRC75B	0.891	0.0289258
MTMR10	0.891	0.0173353
NHLRC3	0.891	-0.0147868
SMARCC2	0.891	0.0365051
VWA8	0.891	-0.0133001
WFDC10B	0.891	0.0521195
ACP7	0.89	0.0744992
CAAP1	0.89	-0.032905
CBWD3	0.89	-0.0753828
CMAS	0.89	0.022287
DISC1	0.89	-0.0689506
DUS2	0.89	-0.0296173
EMC10	0.89	0.065879
FBXO5	0.89	-0.0422706
OR2A20P	0.89	0.0204985
PPP2R3A	0.89	-0.0148888
SFPQ	0.89	0.0185465
SH3GL1	0.89	0.0192387
SPAG16	0.89	0.0250965
STX17	0.89	0.0604035
TBX6	0.89	-0.0786663
C11orf49	0.889	-0.0532763
C19orf52	0.889	0.0845226
COMMD6	0.889	-0.0235644
CSAD	0.889	0.0252947
KCNRG	0.889	-0.0445717
MTRR	0.889	-0.0259078
OFCC1	0.889	0.0928585
PDHX	0.889	-0.0196005
PHF10	0.889	-0.0398328
PPM1L	0.889	-0.0296994
RNF19A	0.889	-0.0141107
TMEM251	0.889	0.0312608
TPX2	0.889	0.0846644
WHSC1	0.889	-0.0777652
ZMAT5	0.889	0.0462725
AHCYL2	0.888	-0.04247
AHSP	0.888	-0.0472207
ATP8B4	0.888	0.0165343
COL6A5	0.888	0.0500198
CYP3A7	0.888	-0.0340001
GPAA1	0.888	0.0190858
HDAC1	0.888	-0.0170818
HIPK2	0.888	0.0352518
HNRNPA2B1	0.888	-0.0160965
MFSD5	0.888	-0.0522804
PLTP	0.888	-0.0370611
POSTN	0.888	-0.0388829
VPS28	0.888	-0.0247694
ASCC3	0.887	-0.0319526
CBFA2T2	0.887	-0.0564905
CCDC71L	0.887	0.0680311
GJA4	0.887	0.069196
GOSR1	0.887	-0.0263928
KRT75	0.887	-0.0176047
LINC01153	0.887	-0.0899855
NEIL2	0.887	0.0448561
SLC18B1	0.887	0.0261585
SLC39A8	0.887	0.0229318
TANC2	0.887	-0.117719
TMA7	0.887	0.0152039
ZNF577	0.887	0.0665854
BTAF1	0.886	-0.0185826
CCNH	0.886	-0.0267341
CRAMP1	0.886	-0.0437192
HEMK1	0.886	-0.0870955
RNASEH1	0.886	0.0216306
SLC5A2	0.886	0.122602
CTNNBIP1	0.885	-0.0296753
CXCL16	0.885	0.0172552
DTWD1	0.885	-0.0270188
GMPPB	0.885	-0.0265114
MALT1	0.885	0.0220468
PI4KAP1	0.885	-0.0544829
PSMD5-AS1	0.885	-0.0444517
PXYLP1	0.885	0.0381344
RBM23	0.885	-0.0184657
SDC2	0.885	0.0216344
SPG21	0.885	0.0553044
TM9SF4	0.885	0.0176425
TSEN15	0.885	-0.0224956
USF1	0.885	0.0331105
CEND1	0.884	-0.0553085
EDEM2	0.884	-0.01793
MIR1281	0.884	-0.0216541
NNMT	0.884	-0.0502589
OXSR1	0.884	0.0169671
PAQR5	0.884	-0.0565035
PRPS2	0.884	0.0288446
TRRAP	0.884	-0.0214388
DCAF13P3	0.883	-0.0557996
EFNA1	0.883	-0.0191132
EIF3I	0.883	-0.0144914
ENTPD7	0.883	0.0571065
FMC1	0.883	0.0249365
GALE	0.883	0.0246653
GPX8	0.883	0.0236796
IL1RAP	0.883	-0.0595521
KAT8	0.883	-0.0349702
LCE1B	0.883	0.0771268
MTFR1L	0.883	0.0461593
VRK1	0.883	0.048909
ACSM2B	0.882	-0.0162554
ASUN	0.882	0.0605128
CD99L2	0.882	-0.0210664
EIF4E1B	0.882	-0.083565
GPRIN3	0.882	0.0490186
HAX1	0.882	0.0127466
IQCB1	0.882	0.049032
LSM3	0.882	-0.0165018
MAD2L1	0.882	-0.0343544
NR2C1	0.882	-0.0336284
OSBPL8	0.882	0.0366418
TAF1C	0.882	-0.0170038
TMED6	0.882	-0.0515747
TMEM98	0.882	-0.0361429
ZIK1	0.882	-0.0490688
ACAT2	0.881	-0.0576595
ALDH1A3	0.881	0.0778608
C20orf24	0.881	-0.0173507
C7orf31	0.881	-0.0864666
CAPN2	0.881	-0.0541021
FMC1	0.881	0.0251858
IL2RA	0.881	0.0725536
ISYNA1	0.881	0.0206443
KRBOX4	0.881	0.0476479
MED8	0.881	0.0612992
MSRA	0.881	-0.0191742
NRK	0.881	0.056436
RBPMS	0.881	0.0803595
ZNF430	0.881	0.0149158
AGAP1	0.88	0.0312753
C19orf54	0.88	0.0601552
DNAJC28	0.88	0.0142124
ING2	0.88	-0.0474113
LINC00380	0.88	-0.0433419
LOC107987345	0.88	0.0228307
MBNL3	0.88	-0.0206316
NUCKS1	0.88	0.0208283
PALB2	0.88	0.097557
SAMD1	0.88	-0.101501
SHQ1	0.88	0.0379177
SNU13	0.88	-0.0448678
SRP72	0.88	0.0212762
TFB2M	0.88	-0.0163914
TNRC6C	0.88	0.0546309
VIMP	0.88	-0.0220583
WIPI1	0.88	-0.054861
ZNF671	0.88	-0.0389594
CDC42EP1	0.879	0.0257909
MITD1	0.879	-0.0297581
NABP2	0.879	0.0489412
PACSIN1	0.879	-0.0615457
PGK1	0.879	0.0144616
PIFO	0.879	-0.0816134
RBBP8	0.879	0.0386069
RDH11	0.879	-0.0470344
SLC13A4	0.879	0.0596544
UBE2V1	0.879	-0.0469045
UBE2Z	0.879	-0.0278658
VPS41	0.879	-0.189153
ZXDB	0.879	-0.0244611
A1CF	0.878	0.0248469
ARHGEF19	0.878	-0.175806
DNAJB4	0.878	0.0224659
DUSP4	0.878	0.135478
FEZF2	0.878	-0.132094
MFAP4	0.878	0.0208146
NR3C2	0.878	0.0161816
PTPRG	0.878	0.0397448
QRICH1	0.878	-0.0694371
RDX	0.878	0.015298
RPS24	0.878	0.0139314
TIPRL	0.878	-0.0375956
ZNF700	0.878	-0.0171525
ABCC9	0.877	0.0292736
AMMECR1L	0.877	0.0636721
CERS4	0.877	0.0226699
CUL4A	0.877	-0.0158599
HRH1	0.877	-0.0492627
MOB4	0.877	0.0420835
NDUFAF3	0.877	0.0108704
PSPH	0.877	-0.0739978
SLC16A10	0.877	-0.0269168
TROVE2	0.877	0.0181924
AKR1C4	0.876	-0.0213839
BLNK	0.876	0.0210369
CYP2C18	0.876	-0.021981
G6PC	0.876	0.0551054
HNRNPA1P33	0.876	-0.0291762
LUC7L3	0.876	-0.0181025
MANEAL	0.876	-0.05167
NEBL	0.876	0.0318902
RBBP6	0.876	0.112818
SERINC3	0.876	0.0164497
TPP2	0.876	0.0216718
ARL4A	0.875	0.0433579
AVL9	0.875	0.0496491
CCL15	0.875	0.0196649
CDK2AP1	0.875	-0.0203219
KRTAP10-10	0.875	-0.0307944
MTPAP	0.875	0.0262398
OR2D3	0.875	-0.0423472
PRMT2	0.875	0.0651596
RIOK3	0.875	-0.0251503
SEMA5A	0.875	0.0467339
SMARCC1	0.875	-0.0178868
ZDHHC7	0.875	0.0280789
ALX1	0.874	-0.0303956
BVES	0.874	0.0651476
COX5A	0.874	-0.0155109
HIST1H2BD	0.874	0.0404381
LOC729815	0.874	0.116508
MVB12B	0.874	-0.0525233
PPM1L	0.874	0.0830808
SLC17A2	0.874	0.016611
TBP	0.874	0.0228427
TMEM43	0.874	-0.0182196
TPI1P2	0.874	0.0217534
ACP1	0.873	-0.023569
CCAR2	0.873	0.0421013
CCDC186	0.873	0.0821019
CCDC50	0.873	-0.0164876
CES3	0.873	0.0395648
ELMOD3	0.873	0.0300259
ERI1	0.873	-0.064802
LRPAP1	0.873	-0.0175386
MID1	0.873	-0.045575
MRPL35	0.873	-0.0301701
NAT9	0.873	0.0899525
NCBP2	0.873	-0.0259358
BCL11B	0.872	-0.0328382
CCNT1	0.872	0.0487307
EFL1	0.872	-0.070054
FAM26D	0.872	0.0964564
MTERF1	0.872	-0.0471604
PCDHAC2	0.872	-0.0692692
RECQL5	0.872	0.0571259
SLC29A1	0.872	-0.0395196
TMEM203	0.872	-0.0228941
TRERF1	0.872	0.0662736
C7orf49	0.871	-0.077969
EIF2B4	0.871	-0.0186914
IL36B	0.871	-0.0922685
POLR3A	0.871	-0.0218463
SPOUT1	0.871	-0.0235651
SRGN	0.871	0.0297177
VOPP1	0.871	0.120776
AGPAT3	0.87	0.0347234
ANKS1A	0.87	-0.0203162
ASAH2B	0.87	-0.0402983
C1orf137	0.87	-0.0309787
CLRN3	0.87	0.027401
FCHSD2	0.87	0.0449733
FGGY	0.87	0.0289284
GTPBP3	0.87	-0.0404504
HIST2H3D	0.87	-0.0841307
SIVA1	0.87	-0.0171612
SMIM7	0.87	0.0197546
GLDC	0.869	0.0442936
HLA-H	0.869	-0.033118
HOXC6	0.869	0.0189505
MRPL21	0.869	0.0229033
NDUFA11	0.869	0.0177313
PACRG	0.869	0.0937945
POLD4	0.869	0.0346573
PSMC3	0.869	0.0189286
RAB35	0.869	-0.0400456
RAB6A	0.869	0.020568
SNORA66	0.869	-0.0970889
SUPT16H	0.869	-0.0280688
TPGS2	0.869	0.0971462
WBP11	0.869	0.0522011
BZW1	0.868	-0.0158736
ECM1	0.868	-0.0267283
IMP4	0.868	0.0251069
KRTCAP3	0.868	-0.0579831
NT5C2	0.868	-0.0173414
PCK2	0.868	-0.0222095
RABGGTB	0.868	-0.0196149
SPSB2	0.868	-0.0476697
STUB1	0.868	-0.0253529
ZNF330	0.868	0.0474275
C17orf100	0.867	-0.0479218
GK	0.867	0.0510816
GPS1	0.867	0.0746392
GUCY1A3	0.867	0.0392617
HERPUD2	0.867	0.0194859
HNRNPH3	0.867	-0.0196783
JAG2	0.867	0.0480087
MRPS36	0.867	0.0251822
NCF4	0.867	-0.052802
NEDD8	0.867	0.0118779
PANK2	0.867	-0.0276603
PBLD	0.867	-0.0294213
POU6F1	0.867	0.0689089
PSMC4	0.867	-0.0676663
ANKRD46	0.866	0.019579
CCND2	0.866	0.0348669
CFAP206	0.866	0.0482865
CNRIP1	0.866	0.0276607
COG6	0.866	-0.0380167
ENTPD1	0.866	0.064651
FBXW7	0.866	-0.0309192
MOCS1	0.866	-0.0786366
PCNT	0.866	-0.0203688
RNY4	0.866	0.0426027
SGK223	0.866	-0.0424025
SLFN12	0.866	-0.0809976
ZNF641	0.866	0.0232784
ADRA2B	0.865	-0.034682
AMY2B	0.865	-0.0274478
CCT6B	0.865	0.053999
MAP3K5	0.865	0.0297501
PEMT	0.865	-0.0378643
PTPRA	0.865	-0.0169362
THG1L	0.865	-0.0575942
A1CF	0.864	0.0220883
AAR2	0.864	-0.0252319
ALAS1	0.864	0.0380516
CPTP	0.864	0.0305024
FAM107A	0.864	0.0655827
FGD5P1	0.864	0.0261471
INHBC	0.864	0.0936179
MRGPRX4	0.864	-0.0699207
PCBP2	0.864	0.0363707
PIWIL4	0.864	-0.0852827
PPID	0.864	-0.0431859
PSMD4	0.864	-0.0290527
SEMA6C	0.864	0.0649385
SPRED2	0.864	-0.037059
SYF2	0.864	-0.0445525
ZNF319	0.864	-0.0708993
BRAT1	0.863	-0.0254292
FPGS	0.863	-0.140843
HMGN1	0.863	-0.026606
LGMN	0.863	-0.0232491
MFSD9	0.863	-0.0476967
NUB1	0.863	0.0249531
RNF185	0.863	0.0376592
TSC2	0.863	-0.0733037
XPO4	0.863	0.0254331
COL4A3BP	0.862	0.030242
COX19	0.862	0.0230848
HLA-B	0.862	0.0395553
NDRG4	0.862	-0.0961801
PALM	0.862	0.123626
PRDM4	0.862	0.0539041
RPS14	0.862	0.0230225
SPOP	0.862	0.0181304
TMPRSS11A	0.862	0.110559
TNFRSF21	0.862	-0.0526375
TWF1	0.862	-0.0491069
AKAP7	0.861	-0.0371472
C4orf32	0.861	-0.0365639
CCHCR1	0.861	-0.108629
CYP3A5	0.861	0.0191318
DBH	0.861	-0.0356966
HNRNPU	0.861	0.0260914
MRPL22	0.861	-0.0296842
PATL1	0.861	-0.0212918
TMEM191A	0.861	0.0247848
C2orf70	0.86	0.0620492
CDR2L	0.86	0.095127
CNTNAP2	0.86	0.0425949
IRF2BP2	0.86	0.0232302
ME2	0.86	0.0297401
RABGEF1	0.86	0.0956648
ZBTB40	0.86	-0.0497546
ARHGAP40	0.859	-0.06897
C12orf65	0.859	0.0596595
DCAF16	0.859	-0.0484526
DDX25	0.859	0.065801
FXN	0.859	0.0812786
ITIH4	0.859	-0.0499935
MMAA	0.859	-0.0258683
PIGM	0.859	0.023183
RACK1	0.859	-0.0164093
TXNDC15	0.859	-0.0389878
ALG8	0.858	0.0256208
BAMBI	0.858	-0.0361513
BANF2	0.858	0.120852
C11orf74	0.858	0.0486018
DACT2	0.858	0.085156
DBT	0.858	-0.0184886
DPH6	0.858	0.0544228
HPR	0.858	0.0268622
ILF2	0.858	0.0237263
MRPS7	0.858	0.0349344
PRSS2	0.858	0.151121
RBM47	0.858	0.0159717
TPD52L2	0.858	-0.0235271
TXNL4B	0.858	0.0462708
ATP5G2	0.857	0.0181733
ATP5SL	0.857	0.020764
B2M	0.857	0.0272044
EMC6	0.857	-0.0238722
FAM126B	0.857	0.0293667
GRB10	0.857	0.0198647
H3F3AP4	0.857	-0.0173281
IL21R	0.857	0.0444718
MRPL49	0.857	0.0315681
MRPS12	0.857	-0.0169309
PCDHB19P	0.857	-0.0218213
SGCA	0.857	0.0946018
STX19	0.857	-0.148489
UPP2	0.857	0.135525
ZNF80	0.857	-0.0732376
APAF1	0.856	-0.0352144
DPM3	0.856	-0.0247981
MAN2A1	0.856	-0.0451155
MSL2	0.856	-0.037128
OLFML3	0.856	0.0269276
PCDH7	0.856	0.0722154
PERP	0.856	0.020141
SLC25A43	0.856	-0.0382701
SNHG7	0.856	-0.0486777
STK35	0.856	0.0778375
HAL	0.855	-0.0507369
HLA-DQA2	0.855	0.1537
LOC105371763	0.855	-0.0821869
LOC146880	0.855	0.062731
PPP4C	0.855	0.021294
RPS17	0.855	-0.0177811
SCML1	0.855	-0.0182798
BEND7	0.854	-0.0502831
CAPN3	0.854	0.0507213
CARD10	0.854	0.0204233
CD1A	0.854	-0.114146
DYNC2H1	0.854	0.0591342
FAM177A1	0.854	0.0561724
IVNS1ABP	0.854	0.0588975
MAD2L2	0.854	0.0251784
MIR599	0.854	0.0554316
MYBL1	0.854	-0.115297
POLR3A	0.854	-0.039404
SNX22	0.854	-0.0523536
SYF2	0.854	0.0235284
TMOD3	0.854	0.0619645
UGGT2	0.854	-0.0541957
AP4E1	0.853	-0.0679539
AQP9	0.853	0.017748
CTNNAL1	0.853	0.0297967
DGCR5	0.853	0.110816
ERCC1	0.853	-0.0296755
GBA	0.853	-0.0548786
LIF	0.853	0.0396743
LOC100134868	0.853	0.0241663
MAN1A1	0.853	-0.0301331
MBTPS2	0.853	-0.0198739
MRPS21	0.853	-0.0189139
PARVA	0.853	0.0487569
SCRN1	0.853	0.0400108
ANP32C	0.852	-0.0454144
COL7A1	0.852	-0.0997064
FXYD1	0.852	-0.0292418
HSPA12A	0.852	0.122733
MAP3K4	0.852	0.0367975
NLRC3	0.852	-0.0686792
OR11A1	0.852	-0.0678875
SERINC4	0.852	0.0730573
SUB1	0.852	0.0203795
TCN2	0.852	0.0405009
UGT1A6	0.852	0.0544279
ZFC3H1	0.852	-0.0919833
ZNF697	0.852	-0.0737706
CPSF2	0.851	-0.0299967
EBAG9	0.851	-0.0166027
EFNA1	0.851	0.0365946
GALNT16	0.851	-0.0861435
GNMT	0.851	-0.0466979
GPATCH8	0.851	-0.0589003
MED7	0.851	0.0346902
NBPF3	0.851	0.0411446
RPS3A	0.851	-0.0171845
ACTL6B	0.85	0.0747563
AKR1D1	0.85	0.0216145
ATL1	0.85	-0.115194
CD58	0.85	0.0475868
EOGT	0.85	-0.088898
HSD17B10	0.85	0.0196881
LAPTM5	0.85	-0.0981946
MIR939	0.85	0.0472224
NDUFA7	0.85	0.0276178
NUDT18	0.85	0.0689015
PASK	0.85	0.105133
PIK3R1	0.85	-0.0922271
TAS2R41	0.85	-0.197366
TMEM187	0.85	-0.10823
USP25	0.85	-0.0423073
ZNRF3	0.85	-0.04887
BACE1	0.849	-0.0230275
CBY3	0.849	-0.138044
ERCC8	0.849	-0.118044
FAHD2B	0.849	0.0293031
GCC2	0.849	0.0762488
HNRNPA0	0.849	0.0294236
LINC01089	0.849	0.0824216
MMD	0.849	0.0471168
RAD51C	0.849	-0.21352
RAMP3	0.849	-0.0599417
SEC11A	0.849	0.0192809
TDRD1	0.849	0.0262964
ADCY1	0.848	0.167244
ARID5A	0.848	-0.069314
ARL17A	0.848	-0.0513637
ASNS	0.848	0.0795337
CDK11A	0.848	-0.103981
CES1	0.848	-0.0291168
CYP2A7	0.848	-0.0489352
DHPS	0.848	-0.0243189
DNAJC21	0.848	-0.0675926
GRB14	0.848	0.0565446
RD3	0.848	0.112084
RN7SL1	0.848	-0.0215281
SURF1	0.848	0.0270103
TNNT2	0.848	-0.0497871
CCL3L1	0.847	0.0589057
CKS2	0.847	-0.0492349
EFCAB11	0.847	-0.0903788
EIF1	0.847	0.0248099
FIGNL2	0.847	-0.0599581
HAS2	0.847	-0.0933296
LRRC37B	0.847	-0.0404594
MASP1	0.847	0.0400263
MFN1	0.847	-0.0354196
SLC35G5	0.847	-0.0637933
ACER3	0.846	0.0454461
BTD	0.846	0.0382835
DPYSL2	0.846	0.036856
KNOP1	0.846	-0.0676554
MPHOSPH10	0.846	-0.0281037
N6AMT1	0.846	-0.0999326
NPSR1	0.846	-0.0700253
PTTG1IP	0.846	0.0350847
SMNDC1	0.846	-0.0206425
TBCD	0.846	0.18436
TTC8	0.846	-0.0281113
ZNF205-AS1	0.846	-0.144628
ACSL3	0.845	0.032497
C20orf24	0.845	-0.0249642
COL5A1	0.845	-0.06456
GPRASP2	0.845	-0.046599
LRRC8B	0.845	0.0737339
NXT2	0.845	-0.0219914
PAIP1	0.845	0.088211
PRB3	0.845	-0.121876
REV1	0.845	0.0140271
RNF7	0.845	0.0236363
TACC1	0.845	0.0258
WDR49	0.845	0.153123
ZAK	0.845	0.0937973
AOX1	0.844	-0.0238238
BCYRN1	0.844	0.0254183
CACNG6	0.844	0.149035
CDCA4	0.844	0.040968
DHDDS	0.844	0.0627861
DSE	0.844	-0.0362187
GSTTP2	0.844	0.0259305
HDAC2	0.844	-0.158917
HIST2H4A	0.844	-0.0973025
IL18R1	0.844	-0.031161
MAPKAP1	0.844	-0.0434285
MIPEP	0.844	-0.0440322
MMS19	0.844	0.0276602
MREG	0.844	-0.0729974
PEG3	0.844	0.0400482
PLXNA4	0.844	0.0255238
PNPLA2	0.844	0.0391293
RBBP6	0.844	-0.0444521
UGT1A9	0.844	0.0580493
WASH3P	0.844	0.0457944
ZNF676	0.844	-0.0409012
ZNF735	0.844	0.0207196
DCAF5	0.843	-0.0265207
LDB1	0.843	0.0905415
PHF5A	0.843	0.0302674
TM2D3	0.843	-0.0192266
TULP4	0.843	-0.0608699
UQCC3	0.843	0.0671459
ACAD11	0.842	-0.0213667
CNIH1	0.842	0.0238921
EPB41L1	0.842	-0.0232666
IKBIP	0.842	-0.0710285
MAMSTR	0.842	-0.0419957
RCC2	0.842	-0.062614
TMEM33	0.842	-0.0443663
WRAP73	0.842	0.0273757
ZNF598	0.842	0.0293064
CRB1	0.841	-0.109455
DDX60	0.841	0.0547469
DENR	0.841	0.0245837
KCNMA1	0.841	0.0375093
LINC00399	0.841	0.0791402
MARS	0.841	0.0412954
PRB3	0.841	0.0919291
SERPINA4	0.841	-0.033863
SNRNP200	0.841	0.0403353
TCEAL8	0.841	0.0358983
TIGIT	0.841	0.0417613
UQCRB	0.841	0.0714531
CATSPER2P1	0.84	-0.0932181
CDIP1	0.84	0.0539121
CTDSP2	0.84	-0.0263695
CUTA	0.84	0.0205182
CWC22	0.84	-0.0657485
CYB561	0.84	-0.0156406
FAM117B	0.84	0.0427345
MOK	0.84	0.0552397
NDUFS7	0.84	0.0213791
NFX1	0.84	-0.0275499
RPL32P3	0.84	-0.0551744
SLC12A2	0.84	-0.0507689
SNORA29	0.84	-0.0291055
TRAPPC6B	0.84	-0.0253682
VAMP8	0.84	-0.028916
VIT	0.84	0.0768526
WDR13	0.84	-0.0173141
ZNF12	0.84	-0.0279762
ATP5A1	0.839	-0.0227826
CAPN12	0.839	0.0793195
GALE	0.839	0.0188713
HIST2H2BF	0.839	-0.10564
MSANTD2	0.839	-0.0351243
OXA1L	0.839	0.0330025
PALM	0.839	-0.0434504
SCN2A	0.839	0.0757878
SNHG11	0.839	0.0269809
TAX1BP3	0.839	-0.0364583
TUBB	0.839	0.0222354
AKAIN1	0.838	0.0961307
ASPG	0.838	0.0326302
PSMG3	0.838	0.0995619
RMND1	0.838	0.0331368
SORD	0.838	0.0227296
ZNF681	0.838	0.0375738
ARSA	0.837	-0.0573337
C1orf174	0.837	-0.0294955
CD27-AS1	0.837	-0.0292569
CKAP2	0.837	-0.0808727
CNGB1	0.837	0.0229322
CRCP	0.837	0.0717186
DDX24	0.837	0.0330452
EIF5	0.837	0.116097
GCLC	0.837	-0.0199965
MEX3D	0.837	-0.0267984
NOC4L	0.837	0.0872932
RASSF8	0.837	0.147356
SERPINA1	0.837	-0.0179747
SLC30A5	0.837	0.0229632
STK32C	0.837	0.0892367
STOX1	0.837	0.147619
CAPZA1	0.836	-0.0188434
FAM189B	0.836	0.0227617
GRM2	0.836	0.0610569
HIC2	0.836	-0.0620449
ITGAE	0.836	-0.0407834
KRI1	0.836	0.0492794
LRRC40	0.836	0.0169474
OR1J1	0.836	0.0300608
RPP25L	0.836	0.024282
SASS6	0.836	0.0403003
SLC25A4	0.836	-0.0397446
TAF8	0.836	-0.0502923
ZNF37A	0.836	0.0569927
BCKDHB	0.835	-0.0324848
C1QTNF9B-AS1	0.835	0.0947079
CDC26	0.835	-0.0239735
EGFEM1P	0.835	0.023507
GPHB5	0.835	0.0825834
MRI1	0.835	-0.0425766
MRPS26	0.835	-0.0297587
SDCBP2	0.835	-0.155039
ULK2	0.835	0.106294
ADIRF	0.834	0.0699887
CAPS	0.834	0.0405663
CDK5RAP2	0.834	-0.0496567
GPR180	0.834	-0.0374361
IFT88	0.834	0.0272486
MPHOSPH9	0.834	-0.0657185
NIPA1	0.834	0.0340119
NUDT11	0.834	-0.161146
RHBDL3	0.834	0.0459249
RNF144A	0.834	0.047138
ALG8	0.833	-0.0314845
ARL5B	0.833	-0.0433193
ATPIF1	0.833	-0.0341594
CIDECP	0.833	-0.0901614
HMGXB3	0.833	0.0734853
ITFG1	0.833	0.0289937
LOC729080	0.833	-0.0905854
NAA25	0.833	-0.0425925
SNORD87	0.833	-0.0826467
UBE4A	0.833	0.0157417
ABR	0.832	-0.0452626
BGN	0.832	0.0234837
EEF1B2	0.832	0.0184136
PCYOX1	0.832	0.020372
REEP4	0.832	0.0221022
RRAS2	0.832	-0.0399907
UBTF	0.832	0.0508919
ZNF487	0.832	0.07715
CHRDL2	0.831	-0.103838
F8	0.831	0.128541
GRM4	0.831	0.10458
HES4	0.831	-0.0373831
IFNLR1	0.831	0.0414302
LONRF2	0.831	0.124896
MFGE8	0.831	-0.0489393
NID1	0.831	0.0958571
RPGR	0.831	0.107927
SFT2D2	0.831	0.056204
TMEM243	0.831	-0.0838692
ASS1	0.83	0.088051
C20orf96	0.83	0.119679
C5orf47	0.83	0.0832027
DUSP12	0.83	0.0266299
MIR636	0.83	-0.0624382
MUC12	0.83	0.0766925
NMT2	0.83	-0.0931037
PSMB6	0.83	0.0180201
ROPN1B	0.83	0.027776
WDR27	0.83	0.0461139
ATG9A	0.829	-0.0321173
CDC14B	0.829	0.0363483
CRB3	0.829	-0.0550691
FCRL2	0.829	0.0679212
GSTO2	0.829	-0.0814849
HCN4	0.829	-0.066101
IKZF2	0.829	0.0871226
OGFOD3	0.829	0.0698735
PLEC	0.829	0.103311
PXDN	0.829	-0.064342
SPP1	0.829	0.0867079
TMEM178A	0.829	0.0914072
TRAF5	0.829	0.117868
[truncated: 13,479 more rows]

## Sheet: Differentially expressed genes 
Gene.symbol	Padj	logFC
SNORA58	0.0497	-2.58442
SNORD113-7	0.0496	-1.44809
ATP2B2	0.0494	-1.40038
GSG1	0.0494	-1.20491
CASP10	0.0486	-1.25982
ARHGAP8	0.0484	-1.51838
ZNF831	0.0484	1.94138
DKK2	0.0483	-1.02265
CCDC18	0.0481	1.95205
SPSB1	0.0478	1.081
ZBTB43	0.0468	-1.14389
NGDN	0.0467	-1.12426
ARAP3	0.0461	-1.25273
IGFBP2	0.0461	-1.06422
ARL17B	0.0448	-1.22561
IGSF9	0.0446	1.18251
DCAF17	0.0432	-1.03107
RNASEH2A	0.0431	-1.13848
RPS4Y2	0.043	-2.26464
GEMIN2	0.0428	-1.12623
GPNMB	0.0425	-1.42585
DHX9	0.0419	-1.04262
RNF5	0.0418	-1.3654
SLC7A4	0.041	1.14497
SNORD109B	0.0405	1.07804
SESTD1	0.0404	-1.19518
CTBP2	0.0401	-1.05927
DRC7	0.0394	-1.17067
PGBD3	0.0387	-1.12645
SYT7	0.0377	-1.13062
STRA6	0.0375	-1.18071
DTX3L	0.0374	-1.25079
SYNGR1	0.0374	-1.55429
ARHGEF10	0.0372	-1.00333
RETNLB	0.0367	-1.09235
FAM110D	0.0363	-1.49524
SLC19A1	0.0363	1.004
SPINK1	0.0354	3.87157
KIR2DL1	0.0352	-1.35989
FASN	0.0351	1.03259
LOC643387	0.0345	-1.28134
MOSPD2	0.0345	-1.40009
NCF2	0.0343	-1.21172
CXorf23	0.0342	-1.32544
PI15	0.0333	-1.57783
DHRS2	0.0329	-1.33078
DUSP1	0.0324	1.32279
MX1	0.0312	1.02825
HEPACAM	0.0308	-1.43609
SNAI2	0.0307	-1.04349
MAST2	0.0305	-1.05264
PDK1	0.0295	-1.66572
FNDC5	0.0294	1.09242
ARPP21	0.0292	-1.23883
RAPGEF4	0.0287	-1.11363
DHX29	0.0286	-1.07673
ZNF788	0.0284	-1.49086
CPT1B	0.0281	1.52373
KLF4	0.0278	1.36471
PODXL2	0.0264	2.19854
ZSCAN2	0.0263	-1.55701
PROCR	0.026	-1.28325
OR2G2	0.0252	1.06516
KLF4	0.0251	1.69817
SCAND2P	0.0246	-1.34457
ARRDC2	0.0245	1.25114
ZC3H14	0.0242	-1.15973
HELLS	0.024	-1.16001
RAB43	0.0236	-1.41289
PHACTR1	0.0234	1.36554
NUDT1	0.0226	-1.12194
SAMD5	0.0225	-1.15164
FBXO7	0.0223	-1.4113
KMT2C	0.0221	1.32587
OR52W1	0.0221	1.12838
SNORA6	0.0219	1.27455
WHAMMP3	0.0212	-1.01332
LCN2	0.0209	1.09259
VIP	0.0209	-1.66476
TGFBRAP1	0.0208	-1.05421
ZFY	0.0207	-1.12153
LOC102723757	0.0201	-1.43724
DACT1	0.02	-1.20896
KCNS3	0.02	-1.41875
STYX	0.0197	-1.01319
TMEM241	0.0197	1.3185
CD6	0.0191	1.11979
FAM160B2	0.0191	1.0039
PDXDC2P	0.0189	-1.89369
ST8SIA4	0.0187	-1.16359
PRKCB	0.0185	-1.03063
TUBA3E	0.0179	1.00964
DSEL	0.0175	-1.38134
NEUROD6	0.0175	-2.76686
LCOR	0.0174	-1.8341
NAIF1	0.0173	-1.12823
TMEM220	0.0173	-1.15878
FAIM	0.0172	-1.57971
TPK1	0.0172	-1.18576
TYMP	0.017	1.09629
EGR1	0.0169	1.06285
DHX30	0.0167	1.4373
KRT85	0.0161	-1.05928
LOC730101	0.0159	-1.02049
SELE	0.0158	1.39335
ASCL1	0.0155	1.80015
CSRNP1	0.0152	1.36914
DPH5	0.015	-1.23718
MAP2	0.015	-1.46413
SELE	0.0144	1.25939
METTL14	0.0143	-1.27493
RNF144A	0.0142	-1.12569
STK31	0.0141	-1.94599
CXCL10	0.0135	1.04315
RTN4RL1	0.0132	-1.28257
ZNF182	0.0132	-1.63719
ZNF326	0.0131	-1.05738
TMEM154	0.013	1.03194
ATG4C	0.0127	-1.59725
TMEM161B	0.0125	-1.01679
ZNF141	0.0124	-1.57472
DDIT4	0.0123	1.24463
C8orf46	0.0122	-1.08337
DCAF12L1	0.0122	-1.21885
PCDHAC2	0.012	1.35402
ADSSL1	0.0119	-2.41185
HMGA1	0.0119	-1.61049
PPHLN1	0.0119	-1.5575
DOPEY2	0.0116	-1.20227
PTP4A2	0.0116	-1.02573
TRPV4	0.0111	1.35178
ZNF160	0.0109	-2.00412
DPRX	0.0107	-2.08118
WDR20	0.0106	-2.13764
TM6SF2	0.0103	1.07626
SHBG	0.01	-1.20466
BCO2	0.00991	2.06872
MAGEA9	0.00936	-1.96589
CFAP73	0.00932	-1.34864
RANBP3L	0.00929	-1.27928
ALG14	0.00915	-1.12741
KLHL17	0.00889	-1.28154
HTRA3	0.00887	-1.94105
FOS	0.00857	2.42922
TMEM154	0.0084	1.31812
TYMP	0.0083	1.03507
EPHA3	0.00821	-1.35481
NAPSB	0.00818	1.42301
SOCS2	0.00782	-1.03739
C16orf96	0.00773	-1.02672
EFCAB7	0.00773	-1.29291
PSMB8	0.00764	-1.78898
CEP170B	0.00734	1.03278
ZNF280D	0.00697	-1.54003
LEPR	0.00686	-1.2245
TNP1	0.00677	-2.66037
SCARNA2	0.00668	-1.62433
PADI1	0.00659	-1.14124
PLTP	0.00655	1.31893
ANKRD37	0.00621	1.27574
TRIM23	0.00615	-1.60534
RPS15A	0.00609	-1.1724
MAZ	0.00604	-1.38318
CACNA1H	0.00593	1.02011
FAM86B1	0.00581	1.33876
CXCL2	0.00566	1.14471
ANKRD35	0.0056	1.06623
SLC1A2	0.00549	-1.38139
CRHR2	0.0054	-1.97033
CRYAA	0.00523	1.0741
SLC35D1	0.0052	-1.53049
SREBF1	0.00518	1.04971
MIR99AHG	0.00486	-1.45193
SEMA3D	0.00486	-1.75672
SOCS2	0.00483	-1.6165
COL4A5	0.00469	-1.08249
COMMD10	0.00447	-1.05233
BRI3BP	0.00442	1.09152
CCL2	0.00411	2.31423
PLEK2	0.00393	1.73077
STAT1	0.00391	1.09357
UNC80	0.00381	-1.02264
GALK2	0.00377	-1.16991
MEIS2	0.00365	-1.02124
KRTAP4-1	0.00364	1.22403
KIF16B	0.00355	-1.01945
LINGO4	0.00354	1.19408
ISM1	0.00338	1.05565
PLA2G6	0.00325	1.44119
SLC22A10	0.00324	-1.54655
GRIN1	0.00317	-1.33323
TPSAB1	0.0031	-1.04618
POLR2J4	0.00291	-1.73402
SPRY4	0.00283	1.15897
CUX2	0.00267	-1.35438
TARM1	0.00263	-1.28061
KCND3	0.00262	1.00563
C9orf106	0.0026	-1.1769
CWC22	0.0026	-1.30719
CSNK2A1	0.00257	1.06429
JUNB	0.00256	1.6331
SLC22A10	0.00253	-2.10247
FOSB	0.00245	3.67944
NPW	0.00243	-1.07702
MBD3L2	0.00241	-1.23617
SLC22A10	0.00233	-2.28576
DIAPH3	0.00225	1.10897
SLC22A10	0.00212	-2.61658
CCL4	0.00205	1.26726
CGB3	0.00203	-1.33193
CXCL1	0.00201	1.83309
FBXW2	0.00177	-1.342
IER3	0.00174	1.3731
ICA1	0.00173	-1.40587
HSPA4L	0.00168	-1.15786
TVP23B	0.00166	-1.17099
PLPP2	0.00156	-2.13095
RASD1	0.00142	1.23274
SLC38A5	0.00132	-1.29587
EXOSC7	0.00122	-1.16729
PIGP	0.00122	-1.1831
IL7R	0.00119	1.02617
HLA-A	0.00115	-2.5283
PPP1R15A	0.00104	1.19121
UCP1	0.000973	-1.84048
PTGS2	0.000952	1.92587
FAM83A-AS1	0.000879	-2.69157
TRMT1L	0.000871	-1.26565
SNORA5C	0.000821	-1.56408
FBXO3	0.000779	-1.47516
MFSD2A	0.000777	1.31409
CXCL8	0.00076	4.32534
MAFG	0.000656	-2.65474
IREB2	0.000639	-1.21965
TMEM74B	0.00063	1.36387
OAT	0.000623	-1.01938
TP53INP1	0.00061	1.06664
LOC100131496	0.000606	-1.40399
IRF7	0.000582	1.11701
MME	0.000533	1.49511
CRP	0.000486	2.06521
IRF7	0.00048	1.07562
TRIM29	0.000455	1.11201
MAX	0.000446	-1.36675
RNF168	0.000395	-2.42545
LOC100133050	0.00039	-1.48713
SNX7	0.000286	-1.08036
BAALC	0.000273	1.02968
ONECUT2	0.00024	-1.46241
EGR2	0.000237	1.72135
FGD5	0.000229	-1.80666
TSPAN13	0.0002	-1.64141
VWA7	0.000195	1.10597
MRPS12	0.00018	-1.23747
APOL3	0.000134	1.10669
FAM169A	0.00013	-1.11942
LGR4	0.000127	-1.86903
THEMIS2	0.000126	-1.64491
PGGHG	9.57e-05	1.4643
LAMA5	7.23e-05	1.08362
SERPINE1	4.57e-05	2.38877
HGSNAT	3.39e-05	-1.1688
AMN	2.74e-05	1.11914
APOA4	2.17e-05	1.09614
TSPAN13	2.01e-05	-1.02198
PARP12	1.86e-05	1.0898
ARHGEF16	6.1e-06	1.18213
P4HA1	5.66e-06	-2.03955
MBL2	4.17e-06	-1.03905
CACNA1H	2.27e-06	1.09771
RHOB	1.86e-06	1.12108
TSPAN8	1.57e-06	-2.01356
CITED4	7.12e-08	1.04485
